# Supplementary material for: Dietary Acid Load Was Positively Associated with the Risk of Hip Fracture in Elderly Adults
Source: MDPI journal article supplement (doi:10.3390/nu14183748), 2022-09-10
Supplement: s1 [file s1]

**Supplementary Table S1.** Process of participant selection.

| Procedures of Participant Selection   | Cases | Matched Controls |                |
|---------------------------------------|-------|------------------|----------------|
|                                       |       | Community-Based  | Hospital-Based |
| Screened                              | 1915  | 1608             | 307            |
| Excluded (in total)                   | 845   | 721              | 124            |
| Diseases affecting dietary habits     | 352   | 351              | 52             |
| Diseases affecting routine activities | 191   | 242              | 22             |
| Pathological or high-energy fractures | 96    | 0                | 0              |
| Unable to communicate                 | 43    | 28               | 10             |
| Refused to participate                | 138   | 5                | 20             |
| Unreasonable energy intakes*          | 25    | 21               | 7              |
| History of any fracture               | 0     | 74               | 13             |
| Included in the analyses              | 1070  | 887              | 183            |

\*Reasonable range: 800–4000 kcal/d for males and 500–3500 kcal/d for females.
